# Supplementary material for: Label-free detection of creatinine using nitrogen-passivated fluorescent carbon dots
Source: Royal Society of Chemistry journal article supplement (doi:10.1039/d0ra06512a), 2020-01-01
Supplement: d0ra06512a1.pdf [file d0ra06512a1.pdf]

## Supporting Information

### Label-Free Detection of Creatinine by Nitrogen Passivated Fluorescent Carbon-dots

Shagun Kainth<sup>1</sup>, Banibrata Maity<sup>1,2\*</sup> and Soumen Basu<sup>1,2\*</sup>

<sup>1</sup>*School of Chemistry and Biochemistry, Thapar Institute of Engineering and Technology  
Patiala 147004, India*

<sup>2</sup>*School of Chemistry and Biochemistry, Affiliate Faculty—TIET-Virginia Tech Center of  
Excellence in Emerging Materials, Thapar Institute of Engineering and Technology,  
Patiala-147004, India*

\*Corresponding Author E-mail: [banibrata.maity@thapar.edu](mailto:banibrata.maity@thapar.edu) (B. Maity);

[soumen.basu@thapar.edu](mailto:soumen.basu@thapar.edu) (S. Basu)

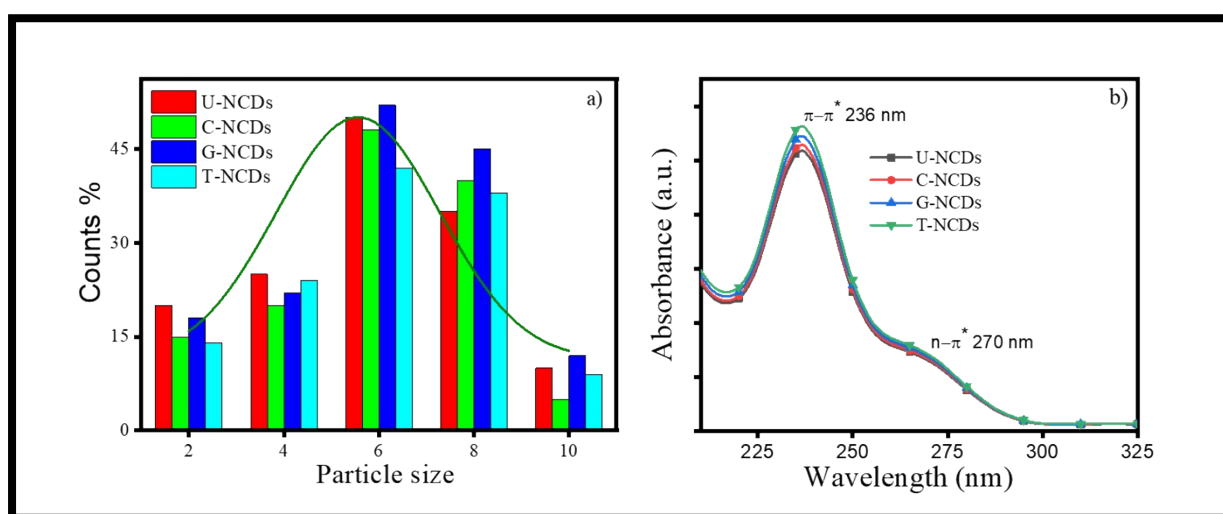

**Fig. S1** Particle size distribution and UV-visible spectra of different NCDs

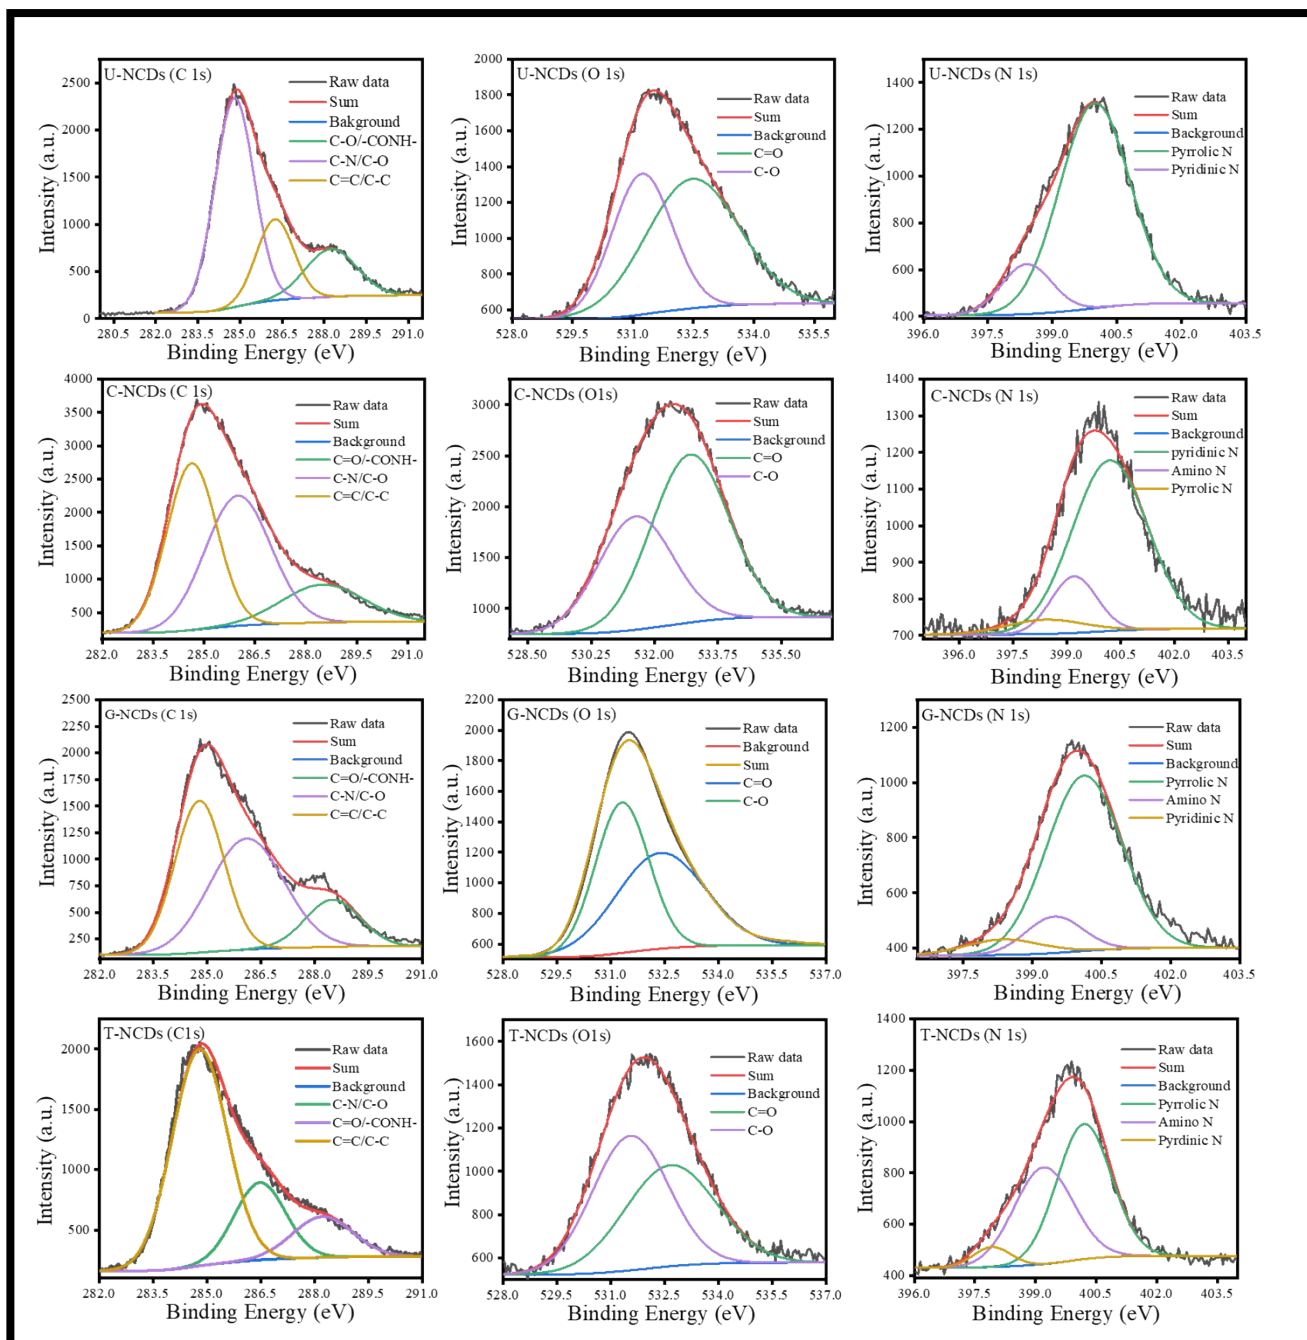

**Fig. S2** Deconvoluted XPS spectra of C 1s O 1s and N 1s for: a) U-NCDs, b) C-NCDs, c) G-NCDs, and d) T-NCDs.

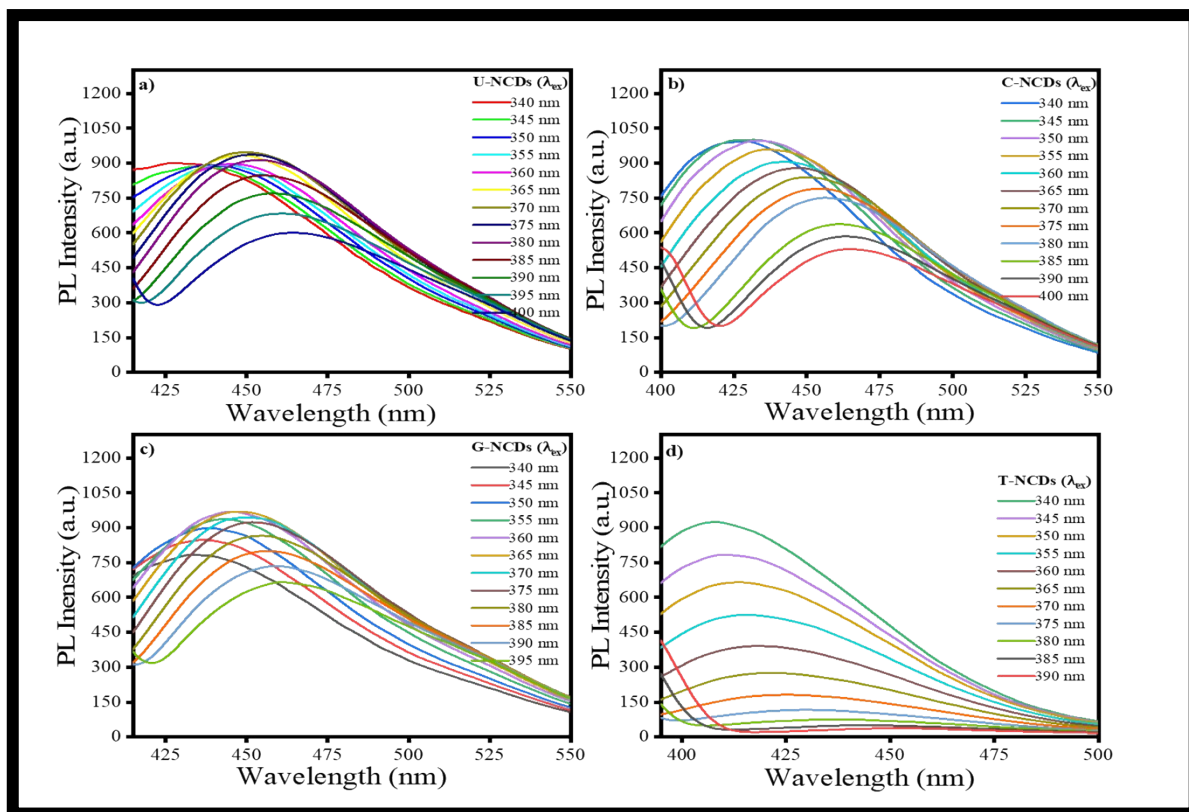

**Fig. S3** Effect of excitation wavelength on emission spectra of: a) U-NCDs, b) C-NCDs, c) G-NCDs, and d) T-NCDs.

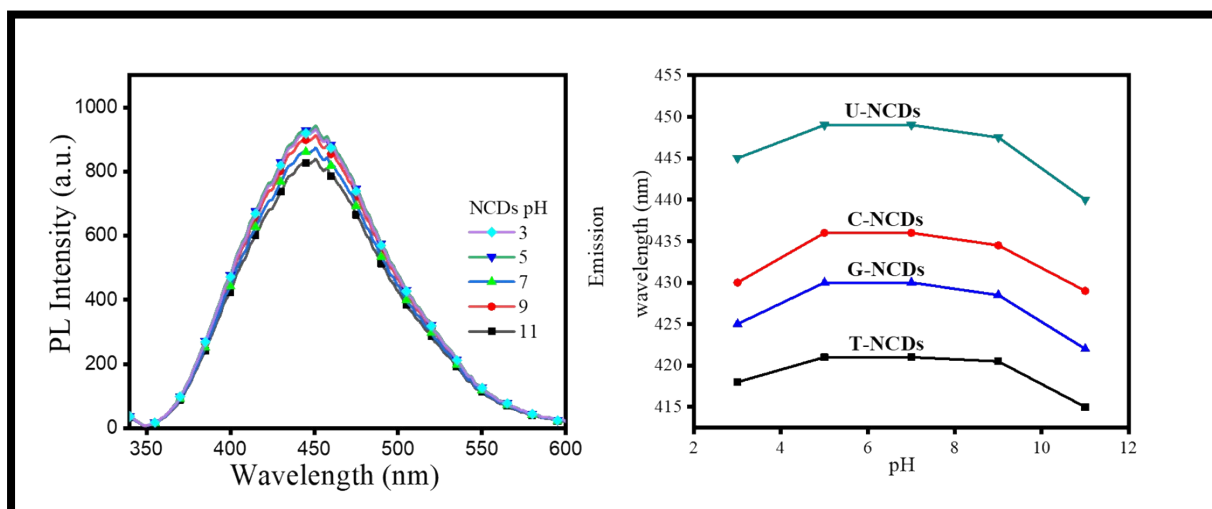

**Fig. S4** Effect of pH a) PL intensity and b) emission wavelength of NCDs.

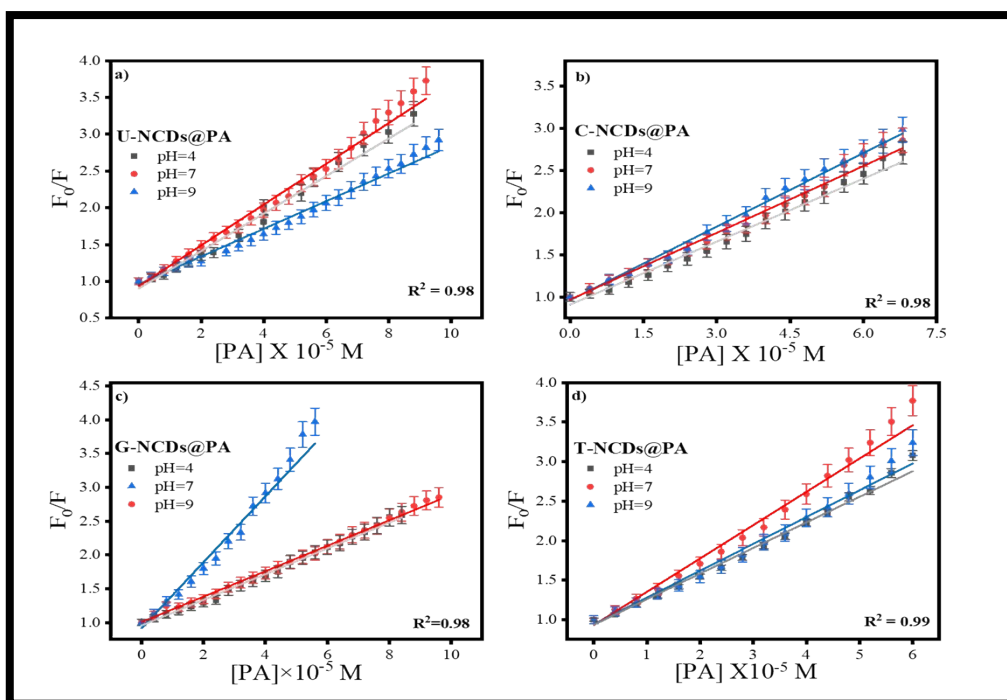

**Fig. S5** Stern Volmer plot for a) U-NCDs b) C-NCDs c) G-NCDs and d) T-NCDs at different pH=4, 7 and 9 in the presence of PA.

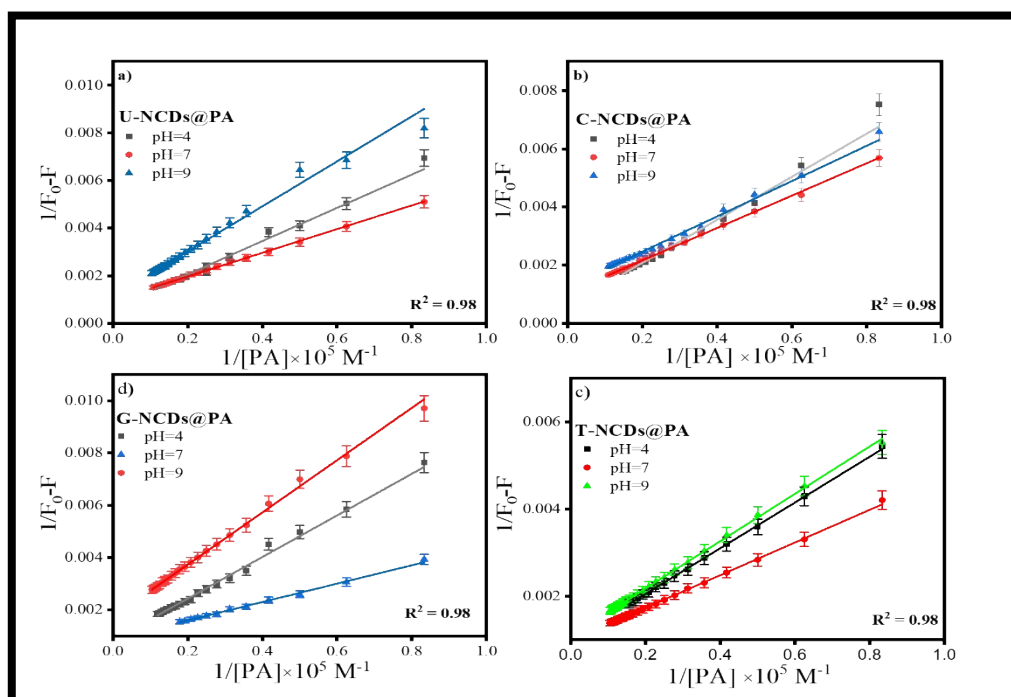

**Fig. S6** B-H plot to evaluate the binding constant at pH=4, 7 and 9 for a) U-NCDs b) C-NCDs c) G-NCDs and d) T-NCDs in the presence of PA.

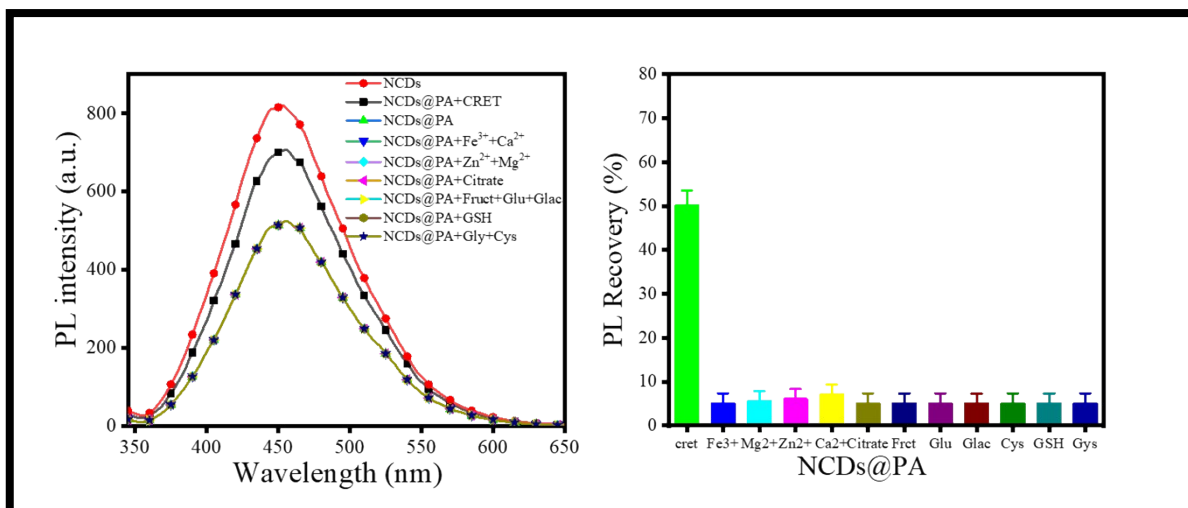

**Fig. S7** Interference studies of NCDs@PA to evaluate the sensing efficacy towards creatinine.

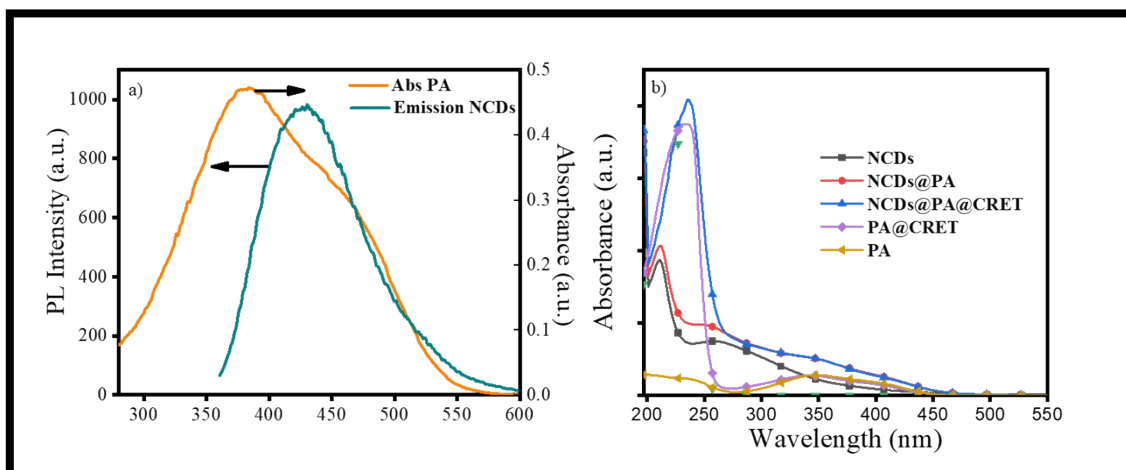

**Fig. S8** Optical properties of NCDs a) combine absorption and emission spectra of PA and NCDs b) absorption spectra of NCDs, NCDs@PA and NCDs@PA@CRET.
